# Supplementary material
Source: Springer Nature journal article supplement (https://www.springermedizin.de/resource/supplementary/13075_2013_4367_MOESM7_ESM.pdf/9696054)

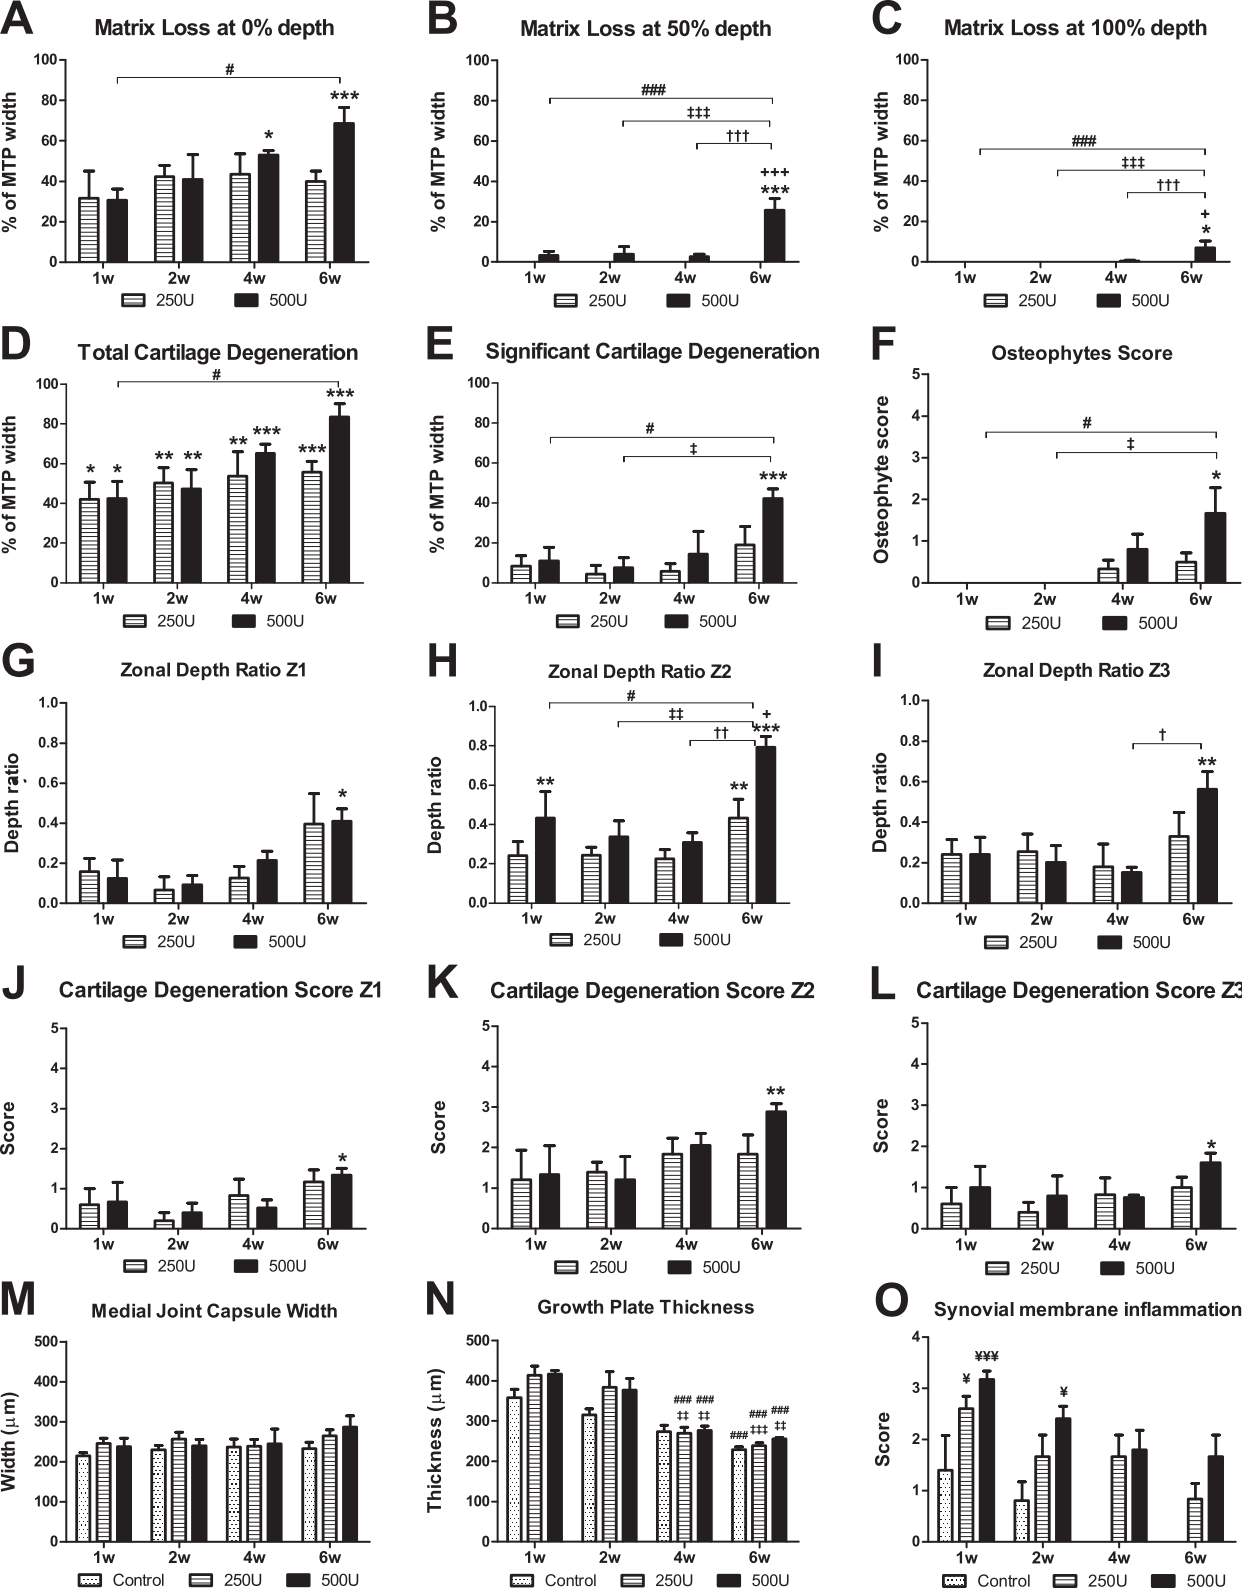

Supplement: MOESM7 [file 9696054]
